# Supplementary material for: Evaluation of sample collection and transport strategies to enhance yield, accessibility, and biosafety of COVID-19 RT-PCR testing
Source: bioRxiv or medRxiv preprint supplement (doi:10.1101/2021.03.03.21251172), 2021-03-05
Supplement: Supplementary file [file media-1.pdf]

|                                                                                                                                                          | Individuals with all negative samples<br>(N=13)               |
|----------------------------------------------------------------------------------------------------------------------------------------------------------|---------------------------------------------------------------|
| Mean Age in years (SD)                                                                                                                                   | 57 (15)                                                       |
| # of Men (%)<br># of Women (%)                                                                                                                           | 8 (61%)<br>5 (39%)                                            |
| Ethnicity (%)<br>Hispanic<br>Black<br>White                                                                                                              | 5 (39%)<br>6 (46%)<br>2 (15%)                                 |
| Comorbidities<br>Hypertension<br>Diabetes Mellitus<br>Coronary Artery Disease<br>Chronic Kidney Disease<br>Lung Disease (eg, COPD)<br>No chronic disease | 5 (39%)<br>2 (15%)<br>1 (8%)<br>3 (23%)<br>2 (15%)<br>5 (38%) |
| COVID symptoms (%)<br>Cough<br>Shortness of breath<br>Fever<br>Diarrhea<br>Chest Pain<br>No COVID symptoms                                               | 3 (23%)<br>4 (31%)<br>4 (31%)<br>2 (15%)<br>0 (0%)<br>8 (62%) |
| Oxygen Support Required (%)<br>None<br>Nasal Canula<br>Mechanical Ventilation                                                                            | 9 (69%)<br>0 (0%)<br>4 (31%)<br>0 (0%)                        |
| Symptom duration prior to baseline collection<br>Mean (range)                                                                                            | 12 days<br>(4 – 28 days)                                      |
| Days between in-hospital NP swab PCR and baseline collection: mean (range)                                                                               | 3 days<br>(1 – 5 days)                                        |
| Number of follow-up time-points per participant: mean (range)                                                                                            | 0                                                             |
| Participants with negative NP swab PCR collected in clinical follow-up during hospitalization                                                            | 6 (50%)                                                       |

Table S1. Characteristics of participants with all negative samples.

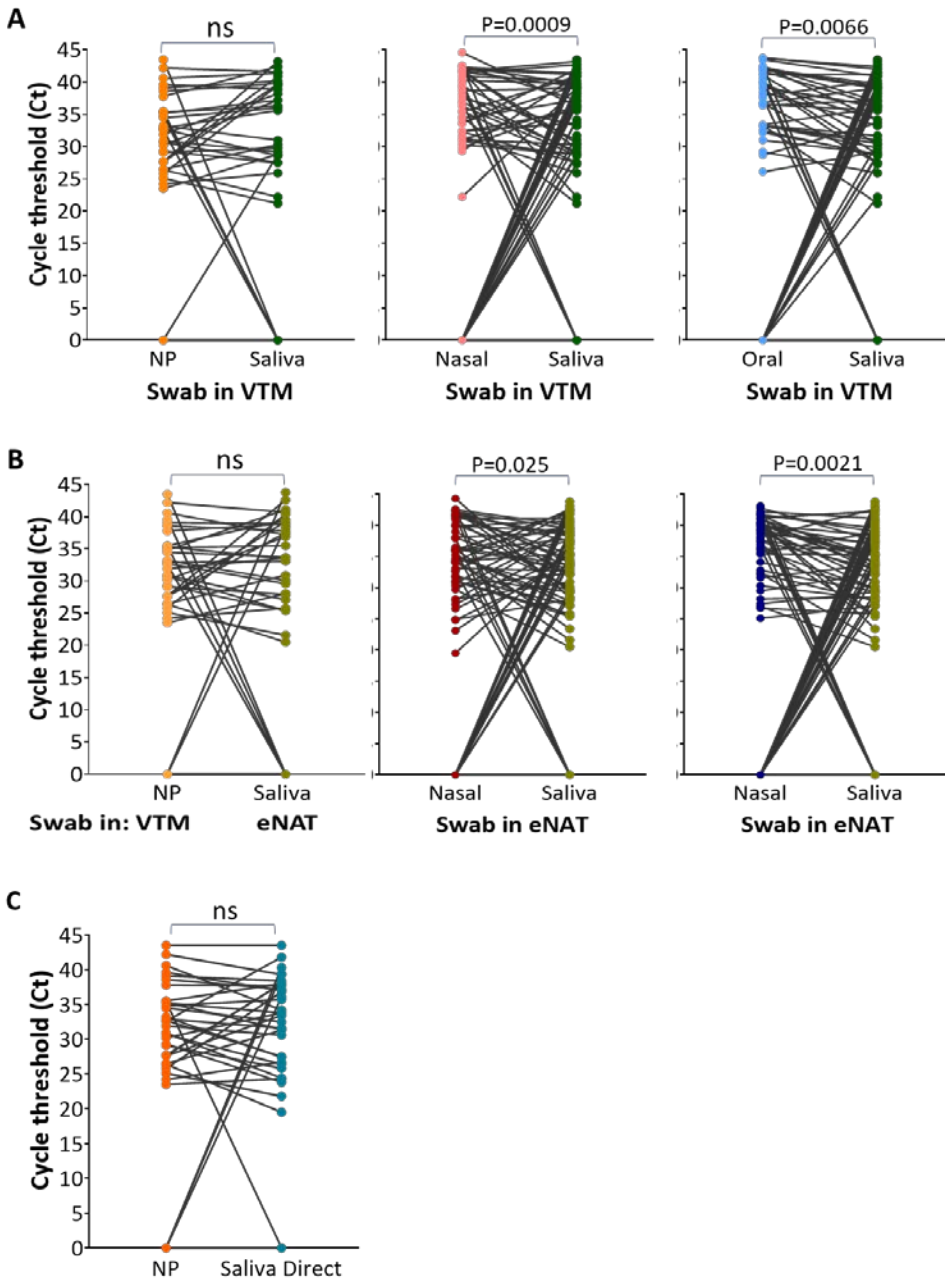

Fig. S2. Paired sample sets showing Ct values comparing each respiratory sample collected in (A) VTM, N=84 and (B) eNAT, N=84. (C) Comparing nasopharyngeal specimens with direct saliva (N=37). The lines indicate samples from the same patient collected at the same time point. ns=not significant.

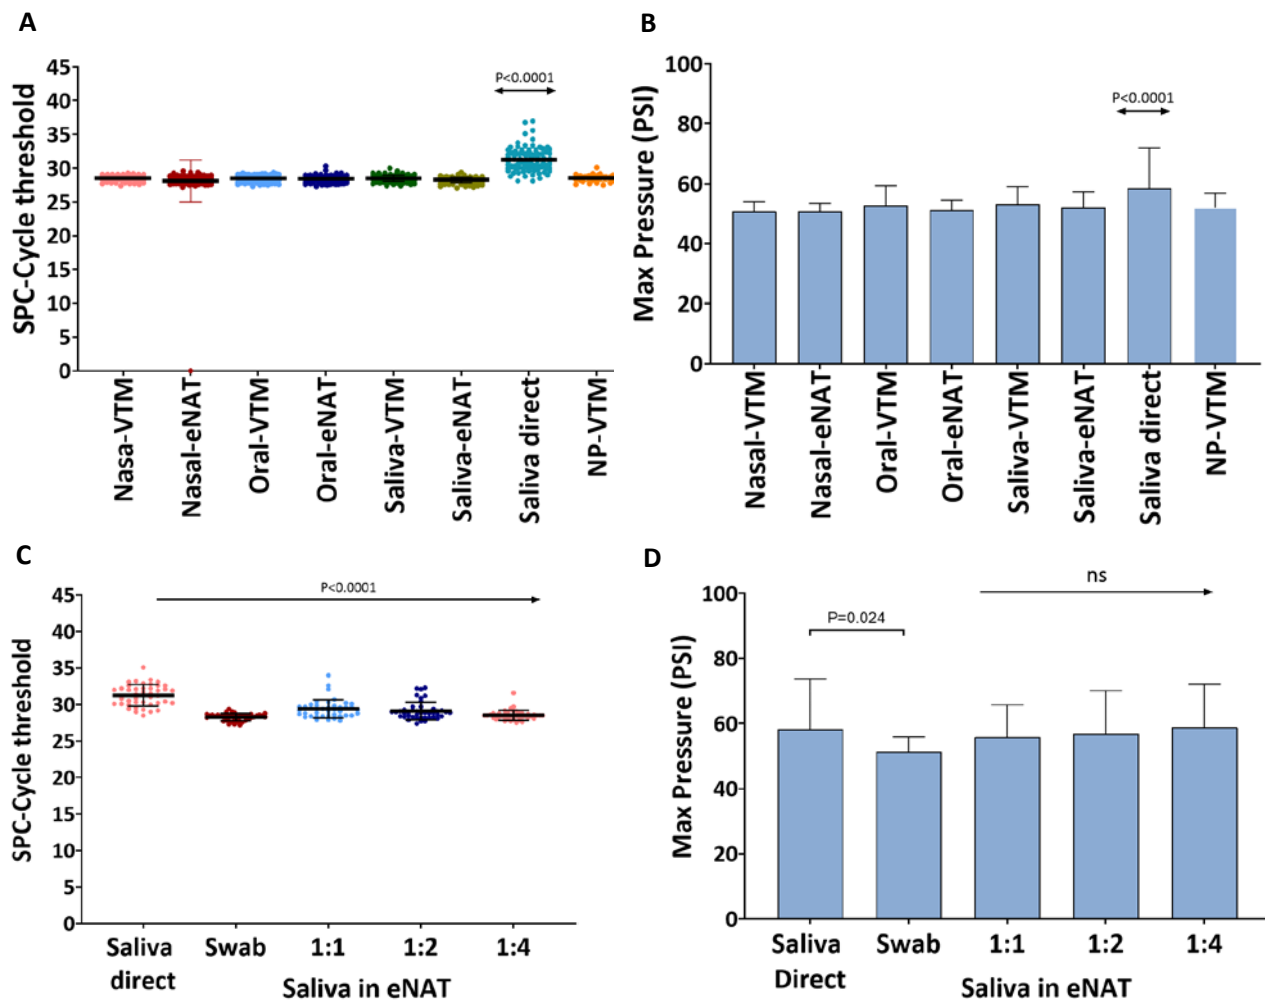

Fig. S3. (A and C) Internal control (SPC) cycle threshold (Ct) values for all respiratory specimens (A, N=84) and for selected saliva samples diluted in eNAT (C, N=44); (B and D) In-cartridge maximum pressure values (PSI) for different respiratory specimens (B, N=84) and for selected saliva samples diluted in eNAT (D, N=44). Each sample tested is represented by points ( $\blacklozenge$ ) on the scatter plot and the lines show the mean and standard deviation values. ns= not statistically significant.
